# Supplementary material
Source: MDPI journal article supplement (https://www.mdpi.com/2076-3417/11/18/8569)
Supplement: s1 [file s1]

Supplementary Material

# 2D Solid-State HETCOR $^1\text{H}$ - $^{13}\text{C}$ NMR Experiments with Variable Cross Polarization Times as a Tool for a Better Understanding of the Chemistry of Cellulose-Based Pyrochars—A Tutorial

Heike Knicker <sup>1,2,\*</sup>, Marta Velasco-Molina <sup>1</sup> and Michael Knicker <sup>3</sup>

<sup>1</sup> Solid-State NMR Service Unit, Instituto de Recursos Naturales y Agrobiología de Sevilla (IRNAS-CSIC), Avda. Reina Mercedes 10, 41012 Seville, Spain

<sup>2</sup> Department of Biogeochemistry, Plant and Microbial Ecology, IRNAS-CSIC, Avda. Reina Mercedes 10, 41012 Seville, Spain

<sup>3</sup> Consult Michael Knicker (CMK), Munich, Max-Friedlaender Bogen 7, 80339 Munich, Germany

\* Correspondence: knicker@imase.csic.es

**Citation:** Knicker, H.; Knicker, M. 2D Solid-State HETCOR  $^1\text{H}$ - $^{13}\text{C}$  NMR Experiments with Variable Cross Polarization Times as a Tool for a Better Understanding of the Chemistry of Cellulose-Based Pyrochars—A Tutorial. *Appl. Sci.* **2021**, *11*, 8569. <https://doi.org/10.3390/app11188569>

Academic Editors: Rafael López Núñez, Francisca Suárez Estrella and Serge Lavoie

Received: 10 August 2021

Accepted: 3 September 2021

Published: 15 September 2021

**Publisher's Note:** MDPI stays neutral with regard to jurisdictional claims in published maps and institutional affiliations.

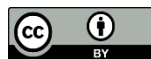

**Copyright:** © 2021 by the authors. Submitted for possible open access publication under the terms and conditions of the Creative Commons Attribution (CC BY) license (<http://creativecommons.org/licenses/by/4.0/>).

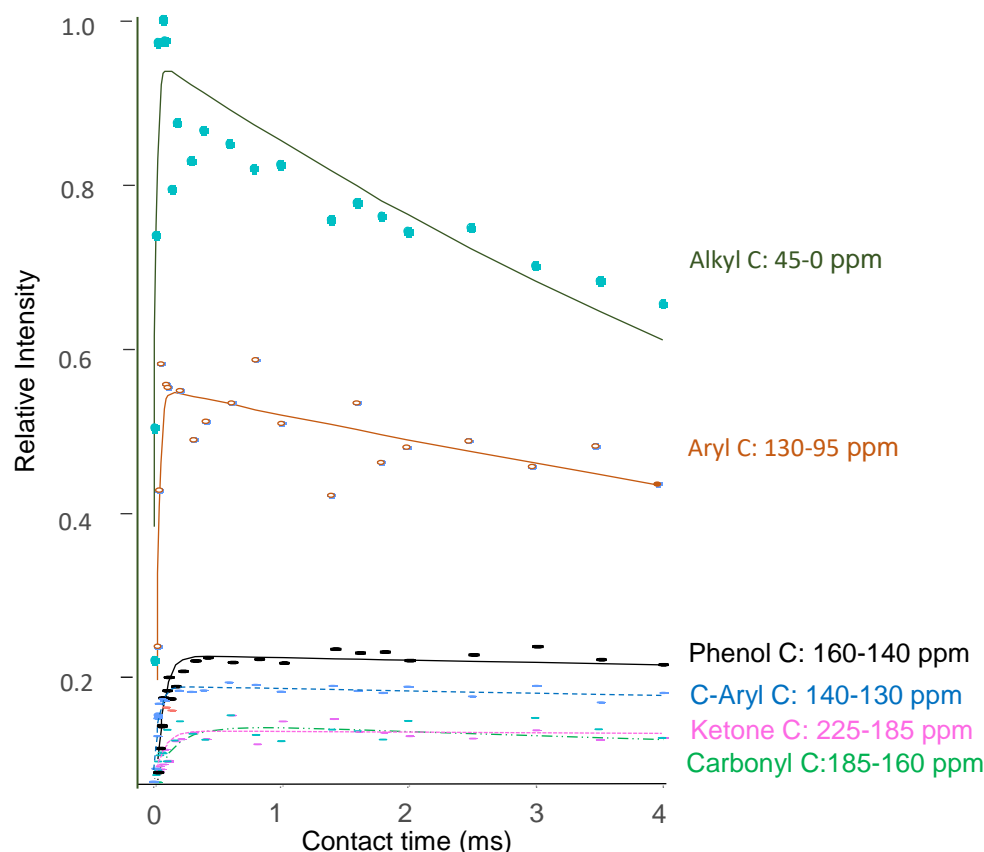

Figure S1: Relative  $^{13}\text{C}$  intensity of the different chemical shift regions as a function of the contact time. The intensity is calibrated to the maximal signal intensity detected during the experiment. Note, no indications for a larger fraction of aromatic C with long CP times are indicated.

Table S1: Cross polarization dynamics with cross polarization rate ( $T_{CH}$ ) and spin-lattice relaxation time in the rotating frame ( $T_{1\rho H}$ ) of a pyrochar derived from cellulose and charred at 350°C for 1 hour. The data were obtained by fitting with a two component model with NMR-Relax provided by CMK (Munich, Germany) and based on Equation 1[1][2].

|                           | Ketone C | Carboxyl C | Phenol C | C-Aryl C | Aryl C | O-Alkyl C | Alkyl C |
|---------------------------|----------|------------|----------|----------|--------|-----------|---------|
| Ppm                       | 225-185  | 185-160    | 160-140  | 140-130  | 130-95 | 80-60     | 45-0    |
| Fraction 1 fast (%)       | 59       | 100        | 57       | 100      | 100    | 100       | 100     |
| Fraction 2 slow (%)       | 41       |            | 43       |          |        |           |         |
| $T_{CH1}$ fast ( $\mu$ s) | 120      | 75         | 40       | 40       | 26     | 17        | 19      |
| $T_{CH2}$ slow ( $\mu$ s) | 304      |            | 174      |          |        |           |         |
| $T_{1\rho H1}$ fast (ms)  | 11       | 74         | 36       | 44       | 18     | 6         | 9       |
| $T_{1\rho H2}$ slow (ms)  | 11       |            | 36       |          |        |           |         |
| Maximum Error             | 0.028    | 0.030      | 0.032    | 0.029    | 0.072  | 0.026     | 0.192   |
| Rmse                      | 0.011    | 0.016      | 0.015    | 0.011    | 0.029  | 0.012     | 0.080   |
| R <sup>2</sup>            | 0.909    | 0.808      | 0.966    | 0.970    | 0.938  | 0.827     | 0.876   |

Equation 1:

$$\begin{aligned}
 M(t_c) &= \sum_i \frac{M_{0i}}{a_{+i} - a_{-i}} \left[ \exp\left(-\frac{a_{-i}t_c}{T_{CHi}}\right) - \exp\left(-\frac{a_{+i}t_c}{T_{CHi}}\right) \right] \\
 a_{+i} &= a_{0i} \left( 1 + \sqrt{1 - \frac{b_i^2}{a_{0i}^2}} \right) \\
 a_{-i} &= a_{0i} \left( 1 - \sqrt{1 - \frac{b_i^2}{a_{0i}^2}} \right) \\
 b_i &= \frac{T_{CHi}}{T_{1\rho Hi}} \left( 1 + \frac{T_{CHi}}{T_{1\rho Ci}} \right) + \varepsilon \frac{T_{CHi}}{T_{1\rho Ci}} \\
 a_0 &= \frac{1}{2} \left( 1 + \varepsilon + \frac{T_{CHi}}{T_{1\rho Hi}} + \frac{T_{CHi}}{T_{1\rho Ci}} \right) \\
 \varepsilon &= \frac{N_s S(S+1)}{N_I I(I+1)}
 \end{aligned} \tag{1}$$

Here,  $t_c$  represents the respective contact time,  $M(t_c)$  is the experimental  $^{13}\text{C}$ -magnetization at  $t_c$ ,  $M_{0i}$  the equilibrium  $^{13}\text{C}$ -magnetization of the component  $i$ ,  $S$ ,  $I$  the spin quantum numbers of  $^{13}\text{C}$  ( $S = 1/2$ ) and  $^1\text{H}$  ( $I = 1/2$ ).  $N_s$  and  $N_I$  are the

number of  $^{13}\text{C}$  and  $^1\text{H}$  nuclei, respectively. The nuclei number is taken into account by  $\varepsilon$ , which approximately becomes zero for a  $^1\text{H}$ – $^{13}\text{C}$  spin system under extreme dilution of  $^{13}\text{C}$  ( $N_I \gg N_S$ ).

Table S2: Intensity distribution in the 1D solid-state  $^{13}\text{C}$  CPMAS NMR spectrum of a cellulose derived pyrochar produced after pyrolysis at 350°C for 1 hour and the respective  $^1\text{H}$  spin-lattice relaxation times ( $T_{1\text{H}}$ ).

| ppm                  | 275-225* | 225- 185 | 185-160 | 160-140 | 140- 130 | 130- 115 | 115- 95 | 95-45 | 45-0 | 0-50* |
|----------------------|----------|----------|---------|---------|----------|----------|---------|-------|------|-------|
| % C                  | 1.3      | 4.1      | 4.2     | 13.1    | 10.1     | 15.4     | 6.8     | 13.0  | 30.7 | 1.3   |
| $T_{1\text{H}}$ (ms) |          | 271      | 321     | 293     | 292      | 286      | 257     | 330   | 280  |       |

\*chemical shift region assigned to spinning side bands

## References

1. Mehring, M. *High Resolution NMR in Solids*; 2nd ed.; Springer: Berlin, 1983;
2. Abelmann, K.; Kleineidam, S.; Knicker, H.; Grathwohl, P.; Kögel-Knabner, I. Sorption of HOC in soils with carbonaceous contamination: Influence of organic-matter composition. *J. Plant Nutr. Soil Sci.* **2005**, *168*, 293–306, doi:10.1002/jpln.200421622.
